# Supplementary material for: Regulated Expression of lpxC Allows for Reduction of Endotoxicity in Bordetella pertussis
Source: MDPI journal article supplement (doi:10.3390/ijms23148027), 2022-07-21
Supplement: s1 [file s1]

**Table S1 |** Bacterial strains and plasmids

| Strain / plasmid           | Description <sup>a</sup>                                                                                                                                                          | Reference   |
|----------------------------|-----------------------------------------------------------------------------------------------------------------------------------------------------------------------------------|-------------|
| <b><i>B. pertussis</i></b> |                                                                                                                                                                                   |             |
| B213                       | Str <sup>R</sup> derivative of strain Tohama I                                                                                                                                    | [50]        |
| B213 $\Delta mlaF$         | $\Delta mlaF::gem$ mutant of B213, Str <sup>R</sup> , Gem <sup>R</sup>                                                                                                            | [28]        |
| B213 $\Delta pldA$         | $\Delta pldA::gem$ mutant of B213, Str <sup>R</sup> , Gem <sup>R</sup>                                                                                                            | [28]        |
| Bp. DM                     | $\Delta pldA::gem$ mutant of B213 $\Delta mlaF$ , Str <sup>R</sup> , Gem <sup>R</sup>                                                                                             | [28]        |
| Bp. RegC                   | B213 with integrated pUCK-lpxC, Str <sup>R</sup> , Amp <sup>R</sup> , Ery <sup>R</sup>                                                                                            | This study  |
| Bp. DM RegC                | Bp. DM with integrated pUCK-lpxC, Str <sup>R</sup> , Gem <sup>R</sup> , Amp <sup>R</sup> , Ery <sup>R</sup>                                                                       | This study  |
| <b><i>E. coli</i></b>      |                                                                                                                                                                                   |             |
| DH5 $\alpha$               | F <sup>-</sup> , $\Delta(lacZYA-argF)U169$ <i>thi-1 hsdR17 gyrA96 recA1 endA1 supE44 relA1 phoA <math>\Phi</math>80 <math>\Delta lacZ\Delta M15</math></i>                        | [51]        |
| <b>Plasmids</b>            |                                                                                                                                                                                   |             |
| pEN11-NMB0338              | pEN11 [52] harboring NMB0338, Ery <sup>R</sup> , Cam <sup>R</sup>                                                                                                                 | Unpublished |
| pUC18                      | Cloning vector, Amp <sup>R</sup>                                                                                                                                                  | [53]        |
| pUCK                       | pUC18 derivative harboring dual <i>lac</i> and <i>tac</i> promoter, <i>lacI<sup>q</sup></i> and Ery <sup>R</sup> cassette from pEN11-NMB0338, Amp <sup>R</sup> , Ery <sup>R</sup> | This study  |
| pUCK- <i>lpxC</i>          | pUCK derivative harboring truncated <i>lpxC</i> gene from <i>B. pertussis</i> B213, Amp <sup>R</sup> , Ery <sup>R</sup>                                                           | This study  |

<sup>a</sup> Str, streptomycin; Gem, gentamicin; Amp, ampicillin; Ery, erythromycin; Cam, chloramphenicol

**Table S2 |** PCR primers used in this study

| Primer           | Sequence (5'→3') <sup>a</sup>        | Description                                                                                                                                                                                   |
|------------------|--------------------------------------|-----------------------------------------------------------------------------------------------------------------------------------------------------------------------------------------------|
| pENP_ery_Fw      | GCGCGCGGTACCGGTATCAACACTGCAGAA       | Primers for amplification of pEN11 fragment including <i>plac</i> , <i>ptac</i> , <i>lacI<sup>q</sup></i> , and erythromycin-resistance cassette, introducing PstI and NdeI restriction sites |
| pENP_Rev_NdeI    | CGCGCGCATATGCAGTTCCTTGTTGGTGCGGA     |                                                                                                                                                                                               |
| RegLpxC-FW-NdeI  | GCGCGCCATATGTTCCGACAGCGCAGTATTC      | Primers for amplification of <i>B. pertussis lpxC</i> introducing premature stop codon and NdeI and AatII restriction sites                                                                   |
| RegLpxC-RV-AatII | GCGCGCGACGTCCTAATGGCCCGATTTGTAGGCAAC |                                                                                                                                                                                               |
| pENP-Sh-Fw-XbaI  | GCGCGCTCTAGATGTGGAATTGTGAGCGGATA     | Primers for confirmation of construct integration aligning at the promoter of the vector and the chromosomal sequence downstream the target gene.                                             |
| Rv-LpxC-dw400    | GAACCAGCATCTGCAGTTG                  |                                                                                                                                                                                               |

<sup>a</sup> Restriction sites are underlined; stop codon (in reverse primer) is in bold

Homologous recombination:

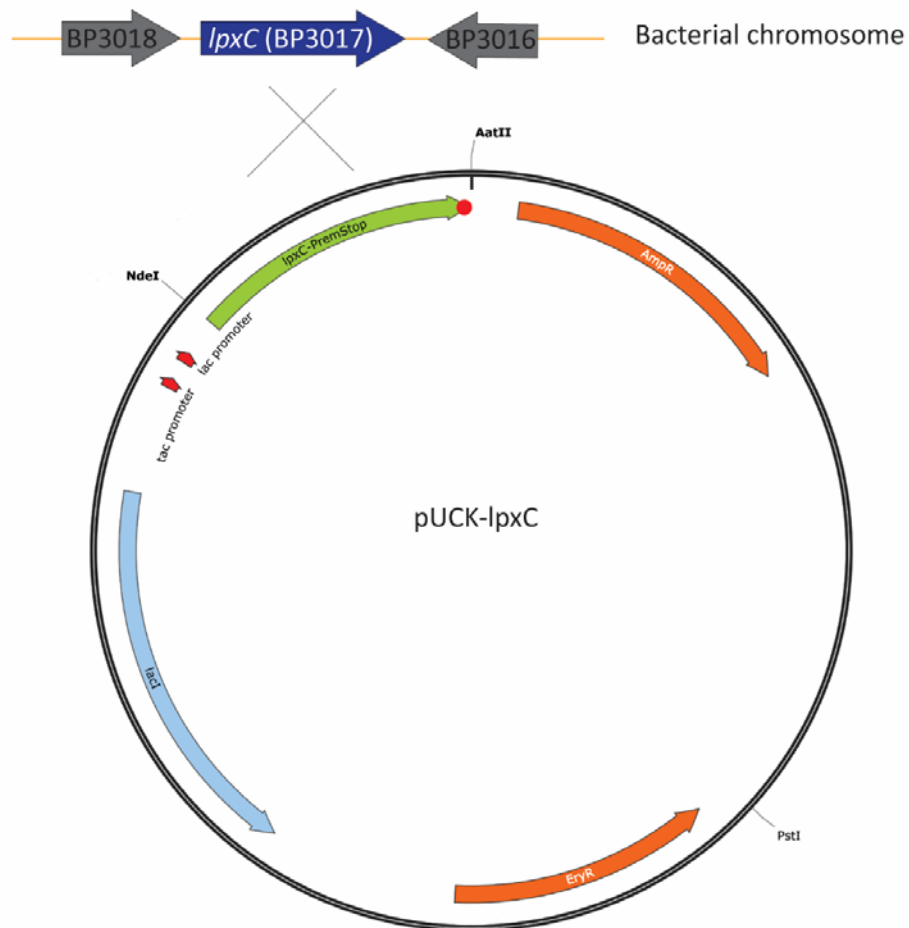

Integrated plasmid:

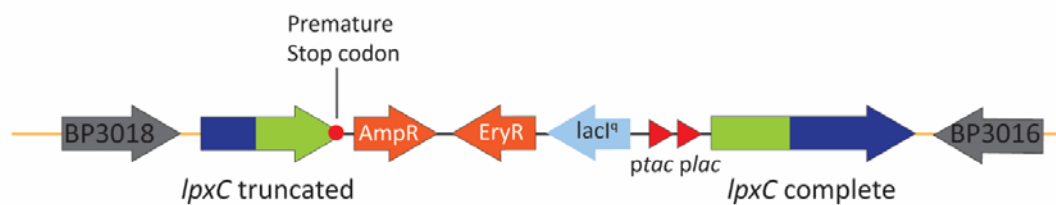

**Figure S1** | Schematic representation of the integration of the pUCK-lpxC construct into the *B. pertussis* chromosome. Integration of the plasmid is achieved by homologous recombination

between a truncated *lpxC* gene (green) containing a premature stop codon (red circle) present on the plasmid and the intact chromosomal gene (dark blue). Chromosomal loci surrounding *lpxC* are depicted in grey. As a result of the integration, the intact *lpxC* copy with its own promoter is disrupted by the premature stop codon, whereas a new intact gene preceded by an IPTG-inducible double promoter (red arrowheads) is created. The presence of a *lacI<sup>q</sup>* gene (light blue) allows for transcriptional repression in the absence of IPTG. The presence of antibiotic-resistance genes (orange) allows for selection of recombinants with the integrated plasmid. Restriction sites utilized during cloning are also depicted.

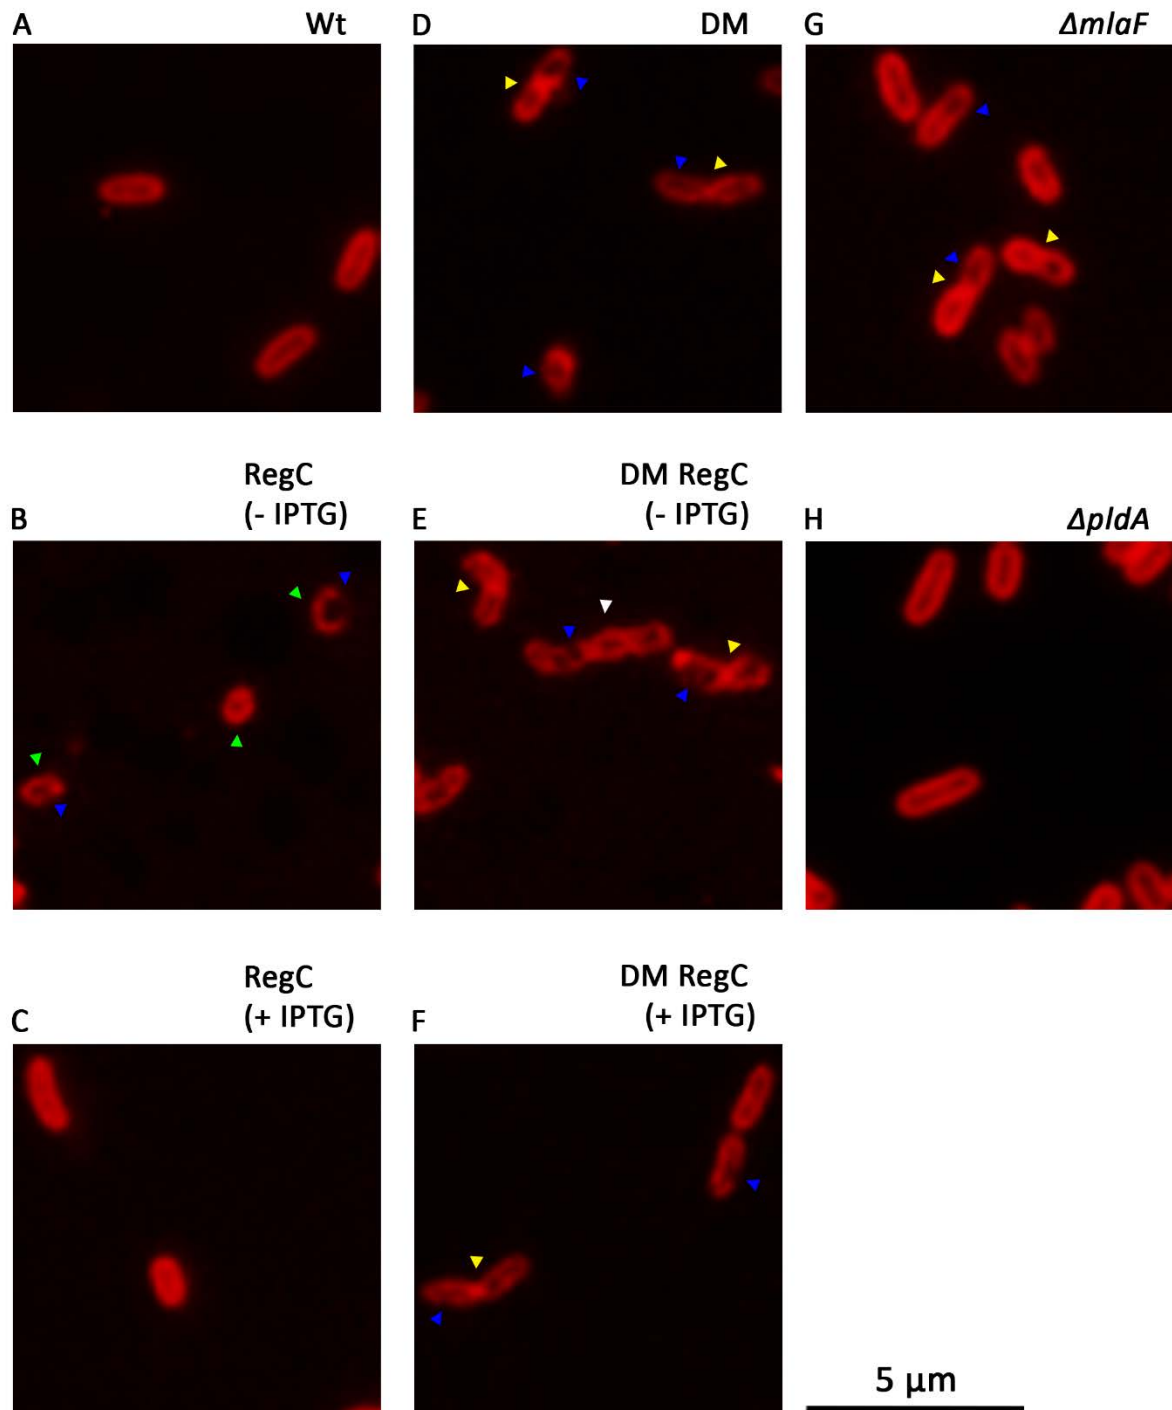

**FIGURE S2 |** Morphology of *B. pertussis* cells visualized by fluorescence microscopy. This figure shows magnified captions from **Figure 3**. Scale bar represents 5  $\mu\text{m}$ . Examples of cells showing shorter and more rounded shape than the wild-type cells (green), uneven dye distribution (blue), or appearing in pairs (yellow) or short chains (white) are indicated with colored arrowheads.
